# Supplementary material for: Cardiometabolic Risk Factors and Cognitive Impairment Among Community-Dwelling Older Adults in Rural India: A Cross- Sectional Analysis of the Longitudinal Ageing Study in India (LASI) Wave 1
Source: Research Square preprint supplement (doi:10.21203/rs.3.rs-9652375/v1), 2026-06-01
Supplement: Supplementary file 1 [file b346b476beaf338bf625e2c5.docx]

**SUPPLEMENTARY FILE 1: STROBE CHECKLIST**

| **Item** | **No.** | **Recommendation** | **Location in Manuscript** |
| --- | --- | --- | --- |
| Title and abstract | 1 | (a) Indicate the study’s design with a commonly used term in the title or the abstract; (b) Provide in the abstract an informative and balanced summary of what was done and what was found | Title; Abstract (all sections) |
| Background/rationale | 2 | Explain the scientific background and rationale for the investigation being reported | Introduction, paragraphs 1–2 |
| Objectives | 3 | State specific objectives, including any prespecified hypotheses | Introduction, paragraph 4 |
| Study design | 4 | Present key elements of study design early in the paper | Methods 2.1 |
| Setting | 5 | Describe the setting, locations, and relevant dates | Methods 2.1 |
| Participants | 6 | Give the eligibility criteria, and the sources and methods of selection of participants | Methods 2.1 |
| Variables | 7 | Clearly define all outcomes, exposures, predictors, potential confounders, and effect modifiers | Methods 2.2–2.3 |
| Data sources/measurement | 8 | For each variable of interest, give sources of data and details of methods of assessment | Methods 2.2–2.3 |
| Bias | 9 | Describe any efforts to address potential sources of bias | Discussion, limitations paragraph |
| Study size | 10 | Explain how the study size was arrived at | Methods 2.1 (secondary analysis, full wave 1 sample) |
| Quantitative variables | 11 | Explain how quantitative variables were handled in the analyses | Methods 2.2–2.4 |
| Statistical methods | 12 | Describe all statistical methods, including those used to control for confounding | Methods 2.4 |
| Descriptive data | 13 | Report numbers of individuals at each stage; report characteristics of study participants; report number of participants with missing data | Results 3.1; Table 1 |
| Outcome data | 14 | Report numbers of outcome events or summary measures | Results 3.2 |
| Main results | 15 | Give unadjusted estimates and, if applicable, confounder-adjusted estimates; report category boundaries when continuous variables were categorised | Results 3.3; Table 2 |
| Other analyses | 16 | Report other analyses done—subgroup analyses, sensitivity analyses | Discussion (subgroup noted) |
| Key results | 17 | Summarise key results with reference to study objectives | Discussion, paragraph 1 |
| Limitations | 18 | Discuss limitations of the study | Discussion, paragraph 5 |
| Interpretation | 19 | Give a cautious overall interpretation of results considering objectives, limitations, and other evidence | Discussion |
| Generalisability | 20 | Discuss the generalisability (external validity) of the study results | Discussion (Tamil Nadu note) |
| Funding | 21 | Give the source of funding and the role of the funders | Declarations — Funding |
